# Supplementary material for: Longevity factor klotho and resistance to cognitive deficits in a transgenic mouse model and in individuals with Parkinson’s disease
Source: Research Square preprint supplement (doi:10.21203/rs.3.rs-89525/v1), 2020-10-16
Supplement: Supplementary file 1 [file 4131fc78d2576a7fbce94440.docx]

**SUPPLEMENTARY INFORMATION**

## **Longevity factor klotho and resistance to cognitive deficits in a transgenic mouse model and in individuals with Parkinson’s disease**

Arturo J. Moreno, Nijee S. Luthra, Luke W. Bonham, Jonathan Lin, Lauren Broestl, Alexandre Bétourné, Rohan Sehgal, Dan Wang, Sylvain E. Lesné, Caroline Tanner, Jill Ostrem, Jennifer S. Yokoyama, Dena B. Dubal

**SUPPLEMENTAL RESULTS**

**Supplementary Table 1, Related to Figure 4.** hSYN/KL mice did not show increased performance over trials compared to hSYN mice on the learning session of the rotarod.

|  | **Estimate** | **Std Error** | **t value** | **p value** | **Significance** |
| --- | --- | --- | --- | --- | --- |
| hSYN vs NTG | 101.46268 | 13.768189 | 7.369355 | <0.001 | *** |
| hSYN vs KL | 122.65079 | 14.160850 | 8.661259 | <0.001 | *** |
| hSYN vs hSYN/KL | 13.93094 | 14.410761 | 0.966704 | 0.34 | - |

**Supplementary Table 2, Related to Figure 5**. hSYN/KL mice had significantly lower total hSYN levels and this effect was observed across the lifespan. The interaction between age:genotype was not significant.

|  | **Estimate** | **Std Error** | **t value** | **p value** | **Significance** |
| --- | --- | --- | --- | --- | --- |
| Age | -0.0186412 | 0.02311513 | -0.806449 | 0.4228 | - |
| Genotype | -0.1965759 | 0.17533925 | -1.121118 | 0.2661 | - |
| Age:Genotype | 0.0040728 | 0.03445738 | 0.118198 | 0.9063 | - |

**Supplementary Table 3, Related to Figure 7.** KL-VS was not associated with increased motor function but was associated with increased performance in cognitive measures. The linear statistical model includes age, sex, education, with and without *APOE* ε4 carrier status, and KL-VS genotype as predictors for cognitive and motor performance.*p<0.05, **p<0.01, ***p<0.001, # (trend, p<0.10).

|  |  | **Estimate** | **Std Error** | **t value** | **p value** | **Significance** |
| --- | --- | --- | --- | --- | --- | --- |
| **Semantic Fluency** | **Healthy Controls** | | | | | |
| Age | -0.19 | 0.07 | 2.71 | 0.01 | ** |
| Sex (M) | 7.35 | 1.69 | 4.34 | <0.001 | *** |
| Education | 0.67 | 0.29 | 2.28 | 0.02 | * |
| Genotype, KL-VS | 1.66 | 1.84 | 0.90 | 0.37 | – |
| **Parkinson's Disease** | | | | | |
| Age | -0.31 | 0.05 | 6.14 | <0.001 | *** |
| Sex (M) | 6.31 | 1.04 | 6.08 | <0.001 | *** |
| Education | 0.74 | 0.16 | 4.53 | <0.001 | *** |
| Genotype, KL-VS | 2.25 | 1.13 | 1.99 | 0.047 | * |
| **Semantic Fluency** (*APOE* ε4 added to model) | **Healthy Controls** | | | | | |
| Age | -0.18 | 0.07 | 2.50 | 0.01 | * |
| Sex (M) | 7.80 | 1.72 | 4.53 | <0.001 | *** |
| Education | 0.86 | 0.30 | 2.90 | 0.004 | ** |
| *APOE* ε4 carrier | 1.36 | 1.84 | 0.74 | 0.46 | – |
| Genotype, KL-VS | 1.47 | 1.87 | 0.79 | 0.43 | – |
| **Parkinson's Disease** | | | | | |
| Age | -0.30 | 0.05 | 5.86 | <0.001 | *** |
| Sex (M) | 5.92 | 1.06 | 5.58 | <0.001 | *** |
| Education | 0.70 | 0.17 | 4.10 | <0.001 | *** |
| *APOE* ε4 carrier | 0.57 | 1.11 | 0.52 | 0.61 | – |
| Genotype, KL-VS | 2.03 | 1.15 | 1.77 | 0.08 | # |
| **Phonemic Fluency** | **Healthy Controls** | | | | | |
| Age | 0.01 | 0.03 | 0.39 | 0.69 | – |
| Sex (M) | 0.92 | 0.67 | 1.38 | 0.17 | – |
| Education | 0.24 | 0.11 | 2.10 | 0.04 | * |
| Genotype, KL-VS | 1.39 | 0.73 | 1.91 | 0.058 | # |
| **Parkinson's Disease** | | | | | |
| Age | -0.03 | 0.02 | 1.43 | 0.15 | – |
| Sex (M) | 0.35 | 0.50 | 0.69 | 0.49 | – |
| Education | 0.35 | 0.08 | 4.44 | <0.001 | *** |
| Genotype, KL-VS | 1.16 | 0.55 | 2.11 | 0.04 | * |
| **Phonemic Fluency** (*APOE* ε4 added to model) | **Healthy Controls** | | | | | |
| Age | 0.01 | 0.03 | 0.46 | 0.65 | – |
| Sex (M) | 1.06 | 0.70 | 1.53 | 0.13 | – |
| Education | 0.29 | 0.12 | 2.40 | 0.02 | * |
| *APOE* ε4 carrier | 8.01x10-4 | 0.74 | 0.001 | 1.00 | – |
| Genotype, KL-VS | 1.27 | 0.76 | 1.67 | 0.10 | # |
| **Parkinson's Disease** | | | | | |
| Age | -0.03 | 0.02 | 1.13 | 0.26 | – |
| Sex (M) | 0.03 | 0.51 | 0.06 | 0.95 | – |
| Education | 0.35 | 0.08 | 4.25 | <0.001 | *** |
| *APOE* ε4 carrier | -0.52 | 0.54 | 0.96 | 0.34 | – |
| Genotype, KL-VS | 1.28 | 0.56 | 2.28 | 0.02 | * |
| **Motor Function** | **Healthy Controls** | | | | | |
| Age | 0.10 | 0.03 | 3.77 | <0.001 | *** |
| Sex (M) | 0.38 | 0.65 | 0.59 | 0.56 | – |
| Education | 0.16 | 0.11 | 1.47 | 0.14 | – |
| Genotype, KL-VS | -0.90 | 0.71 | 1.27 | 0.21 | – |
| **Parkinson's Disease** | | | | | |
| Age | 0.21 | 0.06 | 3.33 | <0.001 | *** |
| Sex (M) | -1.06 | 1.33 | 0.80 | 0.42 | – |
| Education | 0.33 | 0.21 | 1.58 | 0.12 | – |
| Genotype, KL-VS | 1.52 | 1.46 | 1.04 | 0.30 | – |
| **Motor Function** (*APOE* ε4 added to model) | **Healthy Controls** | | | | | |
| Age | 0.10 | 0.03 | 3.64 | <0.001 | *** |
| Sex (M) | 0.37 | 0.68 | 0.55 | 0.59 | – |
| Education | 0.19 | 0.12 | 1.59 | 0.11 | – |
| *APOE* ε4 carrier | -0.18 | 0.73 | 0.24 | 0.81 | – |
| Genotype, KL-VS | -0.81 | 0.75 | 1.09 | 0.28 | – |
| **Parkinson's Disease** | | | | | |
| Age | 0.22 | 0.07 | 3.43 | <0.001 | *** |
| Sex (M) | -1.36 | 1.37 | 1.00 | 0.32 | – |
| Education | 0.32 | 0.22 | 1.47 | 0.14 | – |
| *APOE* ε4 carrier | 0.51 | 1.45 | 0.35 | 0.72 | – |
| Genotype, KL-VS | 1.47 | 1.50 | 0.98 | 0.33 | – |

**Supplementary Table 4, Related to Figure 7.** In non-carriers, CSF aSyn was decreased in PD individuals. In contrast, in KL-VS carriers, it was not decreased. The linear statistical model includes age, sex, *APOE* ε4 carrier status, and PD diagnosis as predictors for CSF aSyn levels.*p<0.05, **p<0.01, ***p<0.001, # (trend, p<0.10).

|  |  | **Estimate** | **Std Error** | **t value** | **p value** | **Significance** |
| --- | --- | --- | --- | --- | --- | --- |
| **CSF**  **α-Synuclein levels** | **Non-Carrier** | | | | | |
| Age | 13.38 | 3.44 | 3.89 | <0.001 | *** |
| Sex (M) | 120.75 | 75.78 | 1.59 | 0.11 | – |
| *APOE* ε4 carrier | -184.24 | 81.64 | 2.26 | 0.02 | * |
| Diagnosis (PD) | -272.31 | 77.38 | 3.52 | <0.001 | *** |
|  | | | | | |
| **KL-VS** | | | | | |
| Age | 16.42 | 5.61 | 2.93 | 0.004 | ** |
| Sex (M) | 202.03 | 118.80 | 1.70 | 0.09 | # |
| *APOE* ε4 carrier | -28.17 | 118.93 | 0.24 | 0.81 | – |
| Diagnosis (PD) | -105.45 | 110.32 | 0.96 | 0.34 | – |

**Supplementary Table 5, Related to Supplementary Figure 2.** KL-VS carriers did not differ between non-carriers in the ratio of CSF total tau over Aβ1-42. The linear statistical model included age, sex, *APOE* ε4 carrier status, and PD diagnosis as predictors for the ratio of CSF total tau over Aβ1-42.

|  |  | **Estimate** | **Std Error** | **t value** | **p value** | **Significance** |
| --- | --- | --- | --- | --- | --- | --- |
| **CSF Tau /**  **Aβ1-42 Ratio** | **Non-Carrier** | | | | | |
| Age | 3.92x10-3 | 9.78x10-3 | 4.01 | <0.001 | *** |
| Sex (M) | 0.03 | 0.02 | 1.37 | 0.17 | – |
| *APOE* ε4 carrier | 0.09 | 0.02 | 3.78 | <0.001 | *** |
| Diagnosis (PD) | -0.03 | 0.02 | 1.03 | 0.30 | – |
|  | | | | | |
| **KL-VS** | | | | | |
| Age | 2.06x10-3 | 1.38x10-3 | 1.49 | 0.14 | – |
| Sex (M) | 0.01 | 0.03 | 0.43 | 0.67 | – |
| *APOE* ε4 carrier | 0.04 | 0.03 | 1.22 | 0.23 | – |
| Diagnosis (PD) | 0.02 | 0.03 | 0.72 | 0.48 | – |

**Supplementary Figure 1. Ro-25, a highly specific GluN2B antagonist, preferentially attenuated LTP in the hippocampus of klotho-overexpressing mice.** (**a**) Normalized fEPSP slopes (%) for saline, 1M, and 1.5M of Ro-25 circulated in the bath 20 minutes prior to LTP induction in CA1 slices of NTG mice. (**b**) The mean of the last 10 minutes of recording; *p<0.05 (Bonferroni-Holm). (**c**) Normalized fEPSP slopes (%) from DG slices for NTG and KL mice treated with either saline or Ro-25 at 1M dosage. (**d**) The mean of the last 10 minutes of recording; *p<0.05 (Bonferroni-Holm).

**Supplementary Figure 2.** **Cerebrospinal fluid (CSF) total tau over Aβ1-42 levels did not differ between non-carriers and KL-VS patients diagnosed with Parkinson’s disease**. (**a**) The ratio of CSF total tau over Aβ1-42; n = 15-125 per group. (**b**) Relative levels of CSF total tau over Aβ1-42 stratified by gene carrier status; n = 53-174 per group. Data are mean + SEM. Data were analyzed by linear models, accounting for effects of age, sex, education, and *APOE* ε4 carrier status and testing for effects due to KL-VS genotype.
